# Supplementary material
Source: publisher figshare collection journal article supplement (https://tandf.figshare.com/ndownloader/files/16442252)
Supplement: Supplementary file 1 [file 16442252]

Supplementary figure legends:

Figure S1: A (ulcerative colitis) and B (Crohn’s disease) illustrate the correlation between the intestinal inflammation (using faecal calprotectin as a surrogate marker) and richness of the microbiome. C (ulcerative colitis) and D (Crohn’s disease) illustrates the correlation between disease extent / localization and the microbiome richness.

Figure S2: The presence/absence of bacteria and / or parasites in the faecal microbiome illustrated with a heatmap
